# Supplementary material
Source: MDPI journal article supplement (https://www.mdpi.com/2073-4441/13/23/3372)
Supplement: s1 [file s1]

# Comparing GHG Emissions from Drained Oil Palm and Recovering Tropical Peatland Forests in Malaysia

Siti Noor Fitriah Azizan <sup>1</sup>, Yuji Goto <sup>1</sup>, Toshihiro Doi <sup>1</sup>, Muhammad Imran Firdaus Kamardan <sup>2</sup>, Hirofumi Hara <sup>3</sup>, Iain McTaggart <sup>4</sup>, Takamitsu Kai <sup>5</sup> and Kosuke Noborio <sup>4,\*</sup>

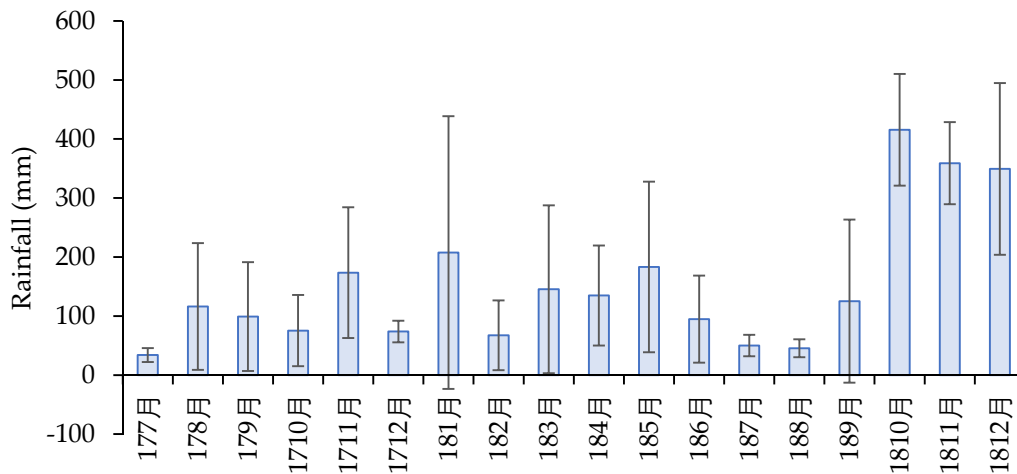

**Figure S1.** Rainfall data from 3 weather stations, Batang Berjuntai, Sungai Karang and Sungai Tenggi Kiri. Error bars represent standard error of the mean.

**Table S1.** GHGs emission of drained-agricultural in tropical peatlands, tropical mineral, and northern peatland by closed chamber and estimation from subsidence measurement. Reviews measurements from IPCC were included in the table.

| Regions                      | Study sites/Ecosystem                                                                                                  | Average emission (mg m <sup>-2</sup> h <sup>-1</sup> ) |       |                 |       |                  |       | Annual emission (g m <sup>-2</sup> yr <sup>-1</sup> ) |              |                 |       |                  |       |
|------------------------------|------------------------------------------------------------------------------------------------------------------------|--------------------------------------------------------|-------|-----------------|-------|------------------|-------|-------------------------------------------------------|--------------|-----------------|-------|------------------|-------|
|                              |                                                                                                                        | CO <sub>2</sub>                                        |       | CH <sub>4</sub> |       | N <sub>2</sub> O |       | CO <sub>2</sub>                                       |              | CH <sub>4</sub> |       | N <sub>2</sub> O |       |
|                              |                                                                                                                        | temp.                                                  | frag. | temp.           | frag. | temp.            | frag. | temp.                                                 | frag.        | temp.           | frag. | temp.            | frag. |
| <b>Tropical/ Subtropical</b> | plantations, drained, or long rotations <sup>1</sup>                                                                   |                                                        |       |                 |       |                  |       | 1500                                                  |              |                 |       |                  |       |
| Tropical/ Subtropical        | plantations, drained, short rotations, e.g., <i>Acacia</i> sp. <sup>1</sup>                                            |                                                        |       |                 |       |                  |       | 2000                                                  |              |                 |       |                  |       |
| Tropical/ Subtropical        | Plantations, drained, oil palm <sup>1</sup>                                                                            |                                                        |       |                 |       |                  |       | 1100                                                  |              |                 |       | 0.12             |       |
| Tropical/ Subtropical        | plantations, shallow-drained (typically less than 0.3 m), typically used for agriculture, e.g., sago palm <sup>1</sup> |                                                        |       |                 |       |                  |       | 150                                                   |              |                 |       | 0.33             |       |
| Tropical/ Subtropical        | Grassland, drained <sup>1</sup>                                                                                        |                                                        |       |                 |       |                  |       | 960                                                   |              |                 |       | 0.5              |       |
| Tropical peatland            | smallholder systems <sup>2</sup>                                                                                       |                                                        |       |                 |       |                  |       | 5100                                                  |              |                 |       |                  |       |
| Tropical peatland            | commercial plantations (oil palm, industrial timber) <sup>2</sup>                                                      |                                                        |       |                 |       |                  |       | 5500                                                  |              |                 |       |                  |       |
| Peninsular Malaysia          | <b>OP [this study]</b>                                                                                                 | <b>97.05</b>                                           |       | <b>0.21</b>     |       | <b>0.05</b>      |       | <b>726.99</b>                                         |              | <b>1.09</b>     |       | <b>0.42</b>      |       |
|                              |                                                                                                                        | <b>±84.42</b>                                          |       | <b>±0.59</b>    |       | <b>±0.06</b>     |       |                                                       |              |                 |       |                  |       |
| Peninsular Malaysia          | young OP <sup>3</sup>                                                                                                  |                                                        |       |                 |       |                  |       |                                                       |              |                 |       | 29.1             |       |
| Regions                      | Study sites/Ecosystem                                                                                                  | Average emission (mg m <sup>-2</sup> h <sup>-1</sup> ) |       |                 |       |                  |       | Annual emission (g m <sup>-2</sup> yr <sup>-1</sup> ) |              |                 |       |                  |       |
|                              |                                                                                                                        | CO <sub>2</sub>                                        |       | CH <sub>4</sub> |       | N <sub>2</sub> O |       | CO <sub>2</sub>                                       |              | CH <sub>4</sub> |       | N <sub>2</sub> O |       |
|                              |                                                                                                                        | temp.                                                  | frag. | temp.           | frag. | temp.            | frag. | temp.                                                 | frag.        | temp.           | frag. | temp.            | frag. |
| Sarawak, Malaysia            | matured OP <sup>4-6</sup>                                                                                              |                                                        |       |                 |       |                  |       | 693 to 4000                                           |              |                 |       | 0.12             |       |
| Sarawak, Malaysia            | young OP <sup>7</sup>                                                                                                  |                                                        |       |                 |       |                  |       |                                                       |              |                 |       | 2.52 ± 17.8      |       |
| Sarawak, Malaysia            | matured Sago plantation <sup>4,5</sup>                                                                                 |                                                        |       |                 |       |                  |       | 762                                                   |              |                 |       | 0.33             |       |
| Kalimantan Indonesia         | matured OP <sup>8,9</sup>                                                                                              | 580 ±0.04                                              |       | 0.013 ±0.7      |       | 4.33 ± 0.3       |       | 1380 to 6150                                          |              | 0.03            |       | 0.5              |       |
| Kalimantan Indonesia         | young OP <sup>8</sup>                                                                                                  |                                                        |       |                 |       |                  |       | 1170 to 17800                                         |              |                 |       |                  |       |
| Kalimantan Indonesia         | matured Rubber plantation <sup>10</sup>                                                                                | 341.25 to 358.75                                       |       |                 |       |                  |       | 1408 to 3293                                          |              |                 |       |                  |       |
| Kalimantan Indonesia         | other agriculture <sup>11-13</sup>                                                                                     |                                                        |       |                 |       | 0.0072 - 0.012   |       | 1716                                                  |              | 0.11            |       | 0.02             |       |
| Sumatra Indonesia            | matured OP <sup>14,15</sup>                                                                                            |                                                        |       |                 |       |                  |       | 1217                                                  | 3410 to 3820 |                 |       |                  |       |
| Sumatra Indonesia            | young OP <sup>16,17</sup>                                                                                              |                                                        |       |                 |       |                  |       | 4575 to 12100                                         |              |                 |       |                  |       |



| Kalimantan, Indonesia | recovery forest <sup>13,21–23</sup>                | 490 ±<br>123                                           | 0.0022 to<br>0.58 |                 |                    | 5240 ±<br>41     | 2.144 ± 7.46     | 0.0 to<br>4.38                                        |                  |                 |                 |                  |              |
|-----------------------|----------------------------------------------------|--------------------------------------------------------|-------------------|-----------------|--------------------|------------------|------------------|-------------------------------------------------------|------------------|-----------------|-----------------|------------------|--------------|
| Kalimantan, Indonesia | recovery scrubs <sup>23</sup>                      | 599 ±<br>150                                           |                   |                 |                    | 4290 ±<br>13.6   | 3.955 ±<br>15.02 | 0.451 ±<br>4.35                                       |                  |                 |                 |                  |              |
| Regions               | Study sites/Ecosystem                              | Average emission (mg m <sup>-2</sup> h <sup>-1</sup> ) |                   |                 |                    |                  |                  | Annual emission (g m <sup>-2</sup> yr <sup>-1</sup> ) |                  |                 |                 |                  |              |
|                       |                                                    | CO <sub>2</sub>                                        |                   | CH <sub>4</sub> |                    | N <sub>2</sub> O |                  | CO <sub>2</sub>                                       |                  | CH <sub>4</sub> |                 | N <sub>2</sub> O |              |
|                       |                                                    | <i>temp.</i>                                           | <i>frag.</i>      | <i>temp.</i>    | <i>frag.</i>       | <i>temp.</i>     | <i>frag.</i>     | <i>temp.</i>                                          | <i>frag.</i>     | <i>temp.</i>    | <i>frag.</i>    | <i>temp.</i>     | <i>frag.</i> |
| Kalimantan, Indonesia | drained forest <sup>6,11,12</sup>                  | 94 to<br>241                                           | 0.01 -<br>0.91    |                 | 0.0001 to<br>0.112 |                  | 2809 to<br>7283  |                                                       | -0.37 to<br>0.28 |                 | 0.07 to<br>1.58 |                  |              |
| Northern peatlands    | drained sites as permanent grassland <sup>20</sup> |                                                        |                   |                 |                    |                  | 500 to<br>880    | -0.15 to<br>0.15                                      |                  |                 |                 |                  |              |

Frequencies of GHGs measurement are categorized into two; *temp.* is continuously measurement for a year or > a year e.g., monthly measurement, while *frag.* referring to the selective duration of measurement e.g., selected months for wet and dry seasons RF: rewetting-restored forest in this study.

**Table S3.** GHGs emission of natural forest system in tropical and northern peatlands by closed chamber and estimation from subsidence measurement.

| Regions                                 | Study sites/<br>Ecosystem             | Average emission (mg m <sup>-2</sup> h <sup>-1</sup> ) |                |                     |                       |                  |                              | Annual emission (g m <sup>-2</sup> yr <sup>-1</sup> ) |                |                  |                   |                  |              |
|-----------------------------------------|---------------------------------------|--------------------------------------------------------|----------------|---------------------|-----------------------|------------------|------------------------------|-------------------------------------------------------|----------------|------------------|-------------------|------------------|--------------|
|                                         |                                       | CO <sub>2</sub>                                        |                | CH <sub>4</sub>     |                       | N <sub>2</sub> O |                              | CO <sub>2</sub>                                       |                | CH <sub>4</sub>  |                   | N <sub>2</sub> O |              |
|                                         |                                       | <i>temp.</i>                                           | <i>frag.</i>   | <i>temp.</i>        | <i>frag.</i>          | <i>temp.</i>     | <i>frag.</i>                 | <i>temp.</i>                                          | <i>frag.</i>   | <i>temp.</i>     | <i>frag.</i>      | <i>temp.</i>     | <i>frag.</i> |
| Peninsular Malaysia                     | NF (this study)                       | 68.33<br>±59.31                                        |                | 5.99<br>±9.85       |                       | 0.01<br>±0.02    |                              | 481.93                                                |                | 24.57            |                   | 0.08             |              |
| Peninsular Malaysia <sup>3,24</sup>     | tropical PSF                          |                                                        | 949-971        |                     | -0.01 to 2            |                  |                              |                                                       |                |                  | -0.09 to<br>17.52 |                  | 4.1          |
| Sarawak Malaysia <sup>4,25,26</sup>     | tropical PSF                          |                                                        |                |                     | -0.00034 to<br>0.0197 |                  | 891 to<br>926                |                                                       | 2.8 to<br>3.92 |                  |                   |                  |              |
| Kalimantan, Indonesia <sup>8,9,27</sup> | tropical PSF                          |                                                        | 0.188 ±<br>0.7 |                     | 0.03 ± 0.03           |                  | 1290<br>± 0.3                |                                                       | 1.4            |                  | 0.52              |                  |              |
| Sumatra, Indonesia                      | tropical PSF <sup>16,17</sup>         |                                                        |                |                     |                       |                  | 4000                         | 6100                                                  |                |                  |                   |                  |              |
| Sumatra, Indonesia                      | tropical mineral forest <sup>19</sup> | 186.64 to<br>195.93                                    |                | -0.002 to -<br>0.04 |                       |                  |                              |                                                       |                |                  |                   |                  |              |
| Panama                                  | tropical PSF                          |                                                        | 0.56 to<br>1.2 |                     |                       |                  | 162 to<br>1693 <sup>28</sup> |                                                       | -18 to 363     |                  |                   |                  |              |
| Northern peatlands                      | Bog <sup>20,29</sup>                  |                                                        |                |                     | 2                     |                  |                              | 500 to<br>880                                         |                | -0.15 to<br>0.15 |                   | 0.15 to<br>3.77  |              |

Frequencies of GHGs measurement are categorized into two; *temp.* is continuously measurement for a year or > a year e.g., monthly measurement, while *frag.* referring to the selective duration of measurement e.g., selected months for wet and dry seasons. PSF: peat swamp forest, NF: natural peat swamp forest in this study.

## Supplementary data references

1. IPCC. 2013 *Supplement to the 2006 IPCC Guidelines for National Greenhouse Gas Inventories: Wet-lands*; Hiraishi, T., Krug, T., Tanabe, K., Srivastava, N., Baasansuren, J., Fukuda, M., Troxler, T.G., Eds; IPCC: Geneva, Switzerland, 2014.
2. Intergovernmental Panel on Climate Change. Agriculture, Forestry and Other Land Use (AFOLU). *Climate Change 2014 Mitigation of Climate Change* **2015**, 811–922. <https://doi.org/10.1017/cbo9781107415416.017>.
3. Cooper, H. v.; Evers, S.; Aplin, P.; Crout, N.; Dahalan, M. P. bin; Sjogersten, S. Greenhouse Gas Emissions Resulting from Conversion of Peat Swamp Forest to Oil Palm Plantation. *Nature Communications* **2020**, *11* (1). <https://doi.org/10.1038/s41467-020-14298-w>.
4. Melling, L.; Hatano, R.; Goh, K. J. Soil CO<sub>2</sub> Flux from Three Ecosystems in Tropical Peatland of Sarawak, Malaysia. *Tellus, Series B: Chemical and Physical Meteorology* **2005**, *57* (1), 1–11. <https://doi.org/10.1111/j.1600-0889.2005.00129.x>.
5. Melling, L.; Hatano, R.; Goh, K. J. Nitrous Oxide Emissions from Three Ecosystems in Tropical Peatland of Sarawak, Malaysia. *Soil Science and Plant Nutrition* **2007**, *53* (6), 792–805. <https://doi.org/10.1111/j.1747-0765.2007.00196.x>.
6. Ishikura, K.; Hirano, T.; Okimoto, Y.; Hirata, R.; Kiew, F.; Melling, L.; Aeries, E. B.; Lo, K. S.; Musin, K. K.; Waili, J. W.; Wong, G. X.; Ishii, Y. Soil Carbon Dioxide Emissions Due to Oxidative Peat Decomposition in an Oil Palm Plantation on Tropical Peat. *Agriculture, Ecosystems & Environment* **2018**, *254*, 202–212. <https://doi.org/https://doi.org/10.1016/j.agee.2017.11.025>.
7. Chaddy, A.; Melling, L.; Ishikura, K.; Hatano, R. Soil N<sub>2</sub>O Emissions under Different N Rates in an Oil Palm Plantation on Tropical Peatland. *Agriculture* . 2019. <https://doi.org/10.3390/agriculture9100213>.
8. Hergoualc'h, K.; Hendry, D. T.; Murdiyarso, D.; Verchot, L. V. Total and Heterotrophic Soil Respiration in a Swamp Forest and Oil Palm Plantations on Peat in Central Kalimantan, Indonesia. *Biogeochemistry* **2017**, *135* (3), 203–220. <https://doi.org/10.1007/s10533-017-0363-4>.
9. Swails, E.; Hergoualc'h, K.; Verchot, L.; Novita, N.; Lawrence, D. Spatio-Temporal Variability of Peat CH<sub>4</sub> and N<sub>2</sub>O Fluxes and Their Contribution to Peat GHG Budgets in Indonesian Forests and Oil Palm Plantations. *Frontiers in Environmental Science* **2021**, *9*, 1–16. <https://doi.org/10.3389/fenvs.2021.617828>.
10. Wakhid, N.; Hirano, T.; Okimoto, Y.; Nurzakiah, S.; Nursyamsi, D. Soil Carbon Dioxide Emissions from a Rubber Plantation on Tropical Peat. *Science of The Total Environment* **2017**, *581–582*, 857–865. <https://doi.org/https://doi.org/10.1016/j.scitotenv.2017.01.035>.
11. Jauhiainen, J.; Silvennoinen, H.; Hämäläinen, R.; Kusin, K.; Limin, S.; Raison, R. J.; Vasander, H. Nitrous Oxide Fluxes from Tropical Peat with Different Disturbance History and Management. *Biogeosciences* **2012**, *9* (4), 1337–1350. <https://doi.org/10.5194/bg-9-1337-2012>.
12. Hooijer, A.; Page, S.; Jauhiainen, J.; Lee, W. A.; Lu, X. X.; Idris, A.; Anshari, G. Subsidence and Carbon Loss in Drained Tropical Peatlands. *Biogeosciences* **2012**, *9* (3), 1053–1071. <https://doi.org/10.5194/bg-9-1053-2012>.
13. Jauhiainen, J.; Page, S. E.; Vasander, H. Greenhouse Gas Dynamics in Degraded and Restored Tropical Peatlands. *Mires and Peat* **2016**, *17*, 1–12. <https://doi.org/10.19189/MaP.2016.OMB.229>.
14. Marwanto, S.; Sabiham, S.; Funakawa, S. Importance of CO<sub>2</sub> Production in Subsoil Layers of Drained Tropical Peatland under Mature Oil Palm Plantation. *Soil and Tillage Research* **2019**, *186*, 206–213. <https://doi.org/https://doi.org/10.1016/j.still.2018.10.021>.
15. Dariah, A.; Marwanto, S.; Agus, F. Root- and Peat-Based CO<sub>2</sub> Emissions from Oil Palm Plantations. *Mitig. Adapt. Strateg. Glob. Change* **2014**, *19*, 831–843.
16. Khasanah, N.; van Noordwijk, M. Subsidence and Carbon Dioxide Emissions in a Smallholder Peatland Mosaic in Sumatra, Indonesia. *Mitigation and Adaptation Strategies for Global Change* **2019**, *24* (1), 147–163. <https://doi.org/10.1007/s11027-018-9803-2>.
17. Husnain, H.; Wigena, I. G. P.; Dariah, A.; Marwanto, S.; Setyanto, P.; Agus, F. CO<sub>2</sub> Emissions from Tropical Drained Peat in Sumatra, Indonesia. *Mitigation and Adaptation Strategies for Global Change* **2014**, *19* (6), 845–862. <https://doi.org/10.1007/s11027-014-9550-y>.
18. Jauhiainen, J.; Hooijer, A.; Page, S. E. Carbon Dioxide Emissions from an Acacia Plantation on Peatland in Sumatra, Indonesia. *Biogeosciences* **2012**, *9* (2), 617–630. <https://doi.org/10.5194/bg-9-617-2012>.
19. Hassler, E.; Corre, M. D.; Tjoa, A.; Damris, M.; Utami, S. R.; Veldkamp, E. Soil Fertility Controls Soil-Atmosphere Carbon Dioxide and Methane Fluxes in a Tropical Landscape Converted from Lowland Forest to Rubber and Oil Palm Plantations. *Biogeosciences* **2015**, *12* (19), 5831–5852. <https://doi.org/10.5194/bg-12-5831-2015>.
20. Kandel, T. P.; Lærke, P. E.; Elsgaard, L. Annual Emissions of CO<sub>2</sub>, CH<sub>4</sub> and N<sub>2</sub>O from a Temperate Peat Bog: Comparison of an Undrained and Four Drained Sites under Permanent Grass and Arable Crop Rotations with Cereals and Potato. *Agricultural and Forest Meteorology* **2018**, *256–257*, 470–481. <https://doi.org/https://doi.org/10.1016/j.agrformet.2018.03.021>.
21. Jauhiainen, J.; Limin, S.; Silvennoinen, H.; Vasander, H. Carbon Dioxide and Methane Fluxes in Drained Tropical Peat Before and After Hydrological Restoration. *Ecology* **2008**, *89* (12), 3503–3514. <https://doi.org/https://doi.org/10.1890/07-2038.1>.
22. Hadi, A.; Inubushi, K.; Furukawa, Y.; Purnomo, E.; Rasmadi, M.; Tsuruta, H. Greenhouse Gas Emissions from Tropical Peatlands of Kalimantan, Indonesia. *Nutrient Cycling in Agroecosystems* **2005**, *71* (1), 73–80. <https://doi.org/10.1007/s10705-004-0380-2>.
23. Murdiyarso, D.; Saragi-Sasmito, M. F.; Rustini, A. Greenhouse Gas Emissions in Restored Secondary Tropical Peat Swamp Forests. *Mitigation and Adaptation Strategies for Global Change* **2019**, *24* (4), 507–520. <https://doi.org/10.1007/s11027-017-9776-6>.
24. Dhandapani, S.; Ritz, K.; Evers, S.; Yule, C. M.; Sjögersten, S. Are Secondary Forests Second-Rate? Comparing Peatland Greenhouse Gas Emissions, Chemical and Microbial Community Properties between Primary and Secondary Forests in Peninsular Malaysia. *Science of the Total Environment* **2019**, *655*, 220–231. <https://doi.org/10.1016/j.scitotenv.2018.11.046>.

25. Ishikura, K.; Hirata, R.; Hirano, T.; Okimoto, Y.; Wong, G. X.; Melling, L.; Aeries, E. B.; Kiew, F.; Lo, K. S.; Musin, K. K.; Waili, J. W.; Ishii, Y. Carbon Dioxide and Methane Emissions from Peat Soil in an Undrained Tropical Peat Swamp Forest. *Ecosystems* **2019**, *22*. <https://doi.org/10.1007/s10021-019-00376-8>.
26. Melling, L.; Hatano, R.; Kah, J. G. Methane Fluxes from Three Ecosystems in Tropical Peatland of Sarawak, Malaysia. *Soil Biology and Biochemistry* **2005**, *37* (8), 1445–1453. <https://doi.org/10.1016/j.soilbio.2005.01.001>.
27. Swails, E.; Jaye, D.; Verchot, L.; Hergoualc'h, K.; Schirrmann, M.; Borchard, N.; Wahyuni, N.; Lawrence, D. Will CO<sub>2</sub> Emissions from Drained Tropical Peatlands Decline Over Time? Links Between Soil Organic Matter Quality, Nutrients, and C Mineralization Rates. *Ecosystems* **2018**, *21* (5), 868–885. <https://doi.org/10.1007/s10021-017-0190-4>.
28. Girkin, N. T.; Vane, C. H.; Cooper, H. v.; Moss-Hayes, V.; Craigon, J.; Turner, B. L.; Ostle, N.; Sjögersten, S. Spatial Variability of Organic Matter Properties Determines Methane Fluxes in a Tropical Forested Peatland. *Biogeochemistry* **2019**, *142* (2), 231–245. <https://doi.org/10.1007/s10533-018-0531-1>.
29. Turetsky, M. R.; Kotowska, A.; Bubier, J.; Dise, N. B.; Crill, P.; Hornibrook, E. R. C.; Minkinen, K.; Moore, T. R.; Myers-Smith, I. H.; Nykänen, H.; Olefeldt, D.; Rinne, J.; Saarnio, S.; Shurpali, N.; Tuittila, E.-S.; Waddington, J. M.; White, J. R.; Wickland, K. P.; Wilmsking, M. A Synthesis of Methane Emissions from 71 Northern, Temperate, and Subtropical Wetlands. *Global Change Biology* **2014**, *20* (7), 2183–2197. <https://doi.org/https://doi.org/10.1111/gcb.12580>.
